# Supplementary material for: Human ATG4 autophagy proteases counteract attachment of ubiquitin-like LC3/GABARAP proteins to other cellular proteins
Source: PubMed Central journal article supplement (PMC6709618; doi:10.1074/jbc.ac119.009977), 2019-07-17
Supplement: supp_AC119.009977_153980_0_supp_354634_p7ss7p.pdf [file supp_AC119.009977_153980_0_supp_354634_p7ss7p.pdf]

**Table S1.** Sequences of primers used to generate Gateway entry clones for LC3B mutants, using either LC3B WT or LC3B G120 as a template.

| <b>LC3B mutation</b> | <b>PCR method</b>                                  | <b>Forward primer sequence (5' to 3')</b>                 | <b>Reverse primer sequence (5' to 3')</b>                                |
|----------------------|----------------------------------------------------|-----------------------------------------------------------|--------------------------------------------------------------------------|
| F80A+L82A            | Overlap extension PCR (step 1 of 2: 5' fragment)   | GGGGACAAGTTTGTACA<br>AAAAAGCAGGCTTAATG<br>CCGTCGGAGAAGACC | GTCCGTTACCGCCAGGG<br>CGAAGGCCTG                                          |
| F80A+L82A            | Overlap extension PCR (step 1 of 2: 3' fragment)   | CAGGCCTTCGCCCTGGCG<br>GTGAACGGAC                          | GGGGACCACTTTGTACAA<br>GAAAGCTGGGTATTACAC<br>TGACAATTTTCATCCCGAA<br>C     |
| F80A+L82A<br>G120    | Overlap extension PCR (step 1 of 2: 3' fragment)   | CAGGCCTTCGCCCTGGCG<br>GTGAACGGAC                          | GGGGACCACTTTGTACAA<br>GAAAGCTGGGTATTACCC<br>GAACGTCTCCTGGG               |
| F80A+L82A            | Overlap extension PCR (step 2 of 2: final product) | GGGGACAAGTTTGTACA<br>AAAAAGCAGGCTTAATG<br>CCGTCGGAGAAGACC | GGGGACCACTTTGTACAA<br>GAAAGCTGGGTATTACAC<br>TGACAATTTTCATCCCGAA<br>C     |
| F80A+L82A<br>G120    | Overlap extension PCR (step 2 of 2: final product) | GGGGACAAGTTTGTACA<br>AAAAAGCAGGCTTAATG<br>CCGTCGGAGAAGACC | GGGGACCACTTTGTACAA<br>GAAAGCTGGGTATTACCC<br>GAACGTCTCCTGGG               |
| Q116P                | Site-directed mutagenesis (NEB Q5 method)          | TATGCCTCCCCGGAGACG<br>TTC                                 | GACCATGTACAGGAATCC                                                       |
| E117P                | Site-directed mutagenesis (NEB Q5 method)          | TGCCTCCAGCCGACGTT<br>CGGG                                 | TAGACCATGTACAGGAAT<br>CC                                                 |
| F119A                | Conventional PCR with mutagenic reverse primer     | GGGGACAAGTTTGTACA<br>AAAAAGCAGGCTTAATG<br>CCGTCGGAGAAGACC | GGGGACCACTTTGTACAA<br>GAAAGCTGGGTATTACAC<br>TGACAATTTTCATCCCGCC<br>GTCTC |
| F119A G120           | Conventional PCR with mutagenic reverse primer     | GGGGACAAGTTTGTACA<br>AAAAAGCAGGCTTAATG<br>CCGTCGGAGAAGACC | GGGGACCACTTTGTACAA<br>GAAAGCTGGGTATTACCC<br>GGCCGTCTCCTGGG               |

**Table S2.** Sequences of primers used for 3xFLAG-ATG3 mutagenesis via inverse PCR (mutated nucleotide in lowercase).

| <b>ATG3 mutation</b> | <b>Forward primer sequence (5' to 3')</b> | <b>Reverse primer sequence (5' to 3')</b> |
|----------------------|-------------------------------------------|-------------------------------------------|
| C264A                | AGTTCACCCAgcCAGGCA<br>TGCTG               | GAACACATGGGAGGTGGT                        |
| K177R                | GATACAAGGAgAATAGTA<br>GAAGCTTG            | TAGGGTAGCCTCATCTGT                        |
| K183R                | GAAGCTTGTAgAGCCAAA<br>ACTG                | TACTATTTTCCTTGTATCT<br>AGG                |
| K185R                | TGTAAAGCCAgAACTGAT<br>GCTG                | AGCTTCTACTATTTTCCTT<br>G                  |
| K208R                | ACTTATGATAgATATTAC<br>CAGACTC             | GATGTAAAGGTCATAAGT<br>TC                  |
| K242R                | GATCATGTGAgGAAAACA<br>GTG                 | CTGACTGATGTCTTCATAC                       |
| K243R                | CATGTGAAGAgAACAGTG<br>ACC                 | ATCCTGACTGATGTCTTC                        |
| K271R                | GAGGTGATGAgGAAAATC<br>ATTGAGACTGTTG       | AGCATGCCTGCATGGGTG                        |
| K272R                | GTGATGAAGAgAATCATT<br>GAGACTGTTGC         | CTCAGCATGCCTGCATGG                        |
| K295R                | ATTTTCTTGAgATTTGTAC<br>AAGCTG             | AAGAAGATACATATGAAC<br>TCC                 |

Figure S1

**A**

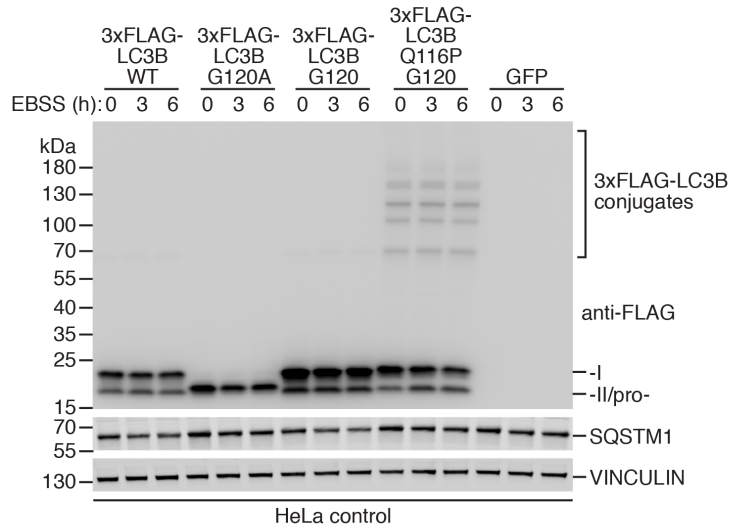

**B**

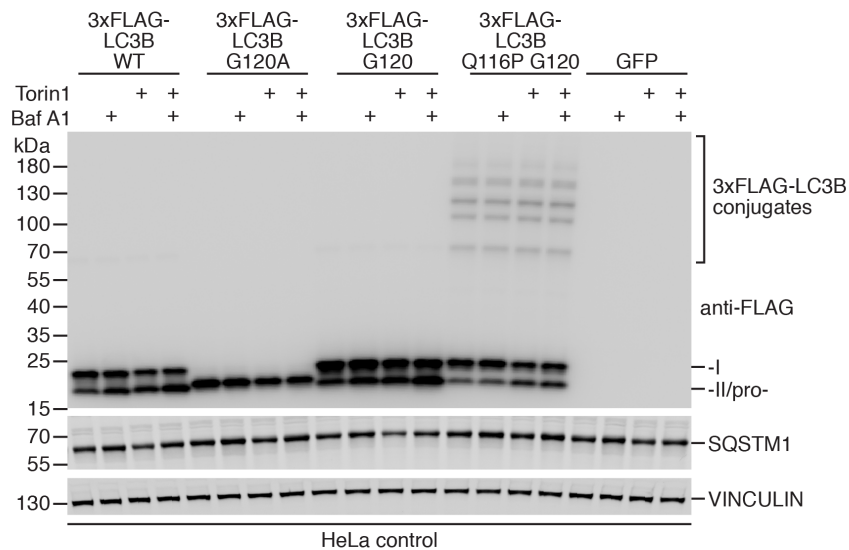

**Figure S1.** 3xFLAG-LC3B conjugate formation is unaffected by autophagy modulation.

(A) HeLa control cells were transfected with 3xFLAG-LC3B constructs or GFP as a transfection control, prior to washing and incubating in EBSS for 0, 3 or 6 hours to induce amino acid and serum starvation. Lysates were subject to western blotting using anti-FLAG antibody, SQSTM1 as an autophagy marker and VINCULIN as a loading control.

(B) HeLa control cells transfected with indicated constructs were subjected to combinations of pharmacological treatments to induce (Torin1, 250 nM) and/or inhibit (baf A1, 10 nM) autophagy for 3 hours prior to harvesting, with equivalent concentrations of DMSO used in untreated or single-treated samples. Lysates were analyzed by western blotting as for (A).

Figure S2

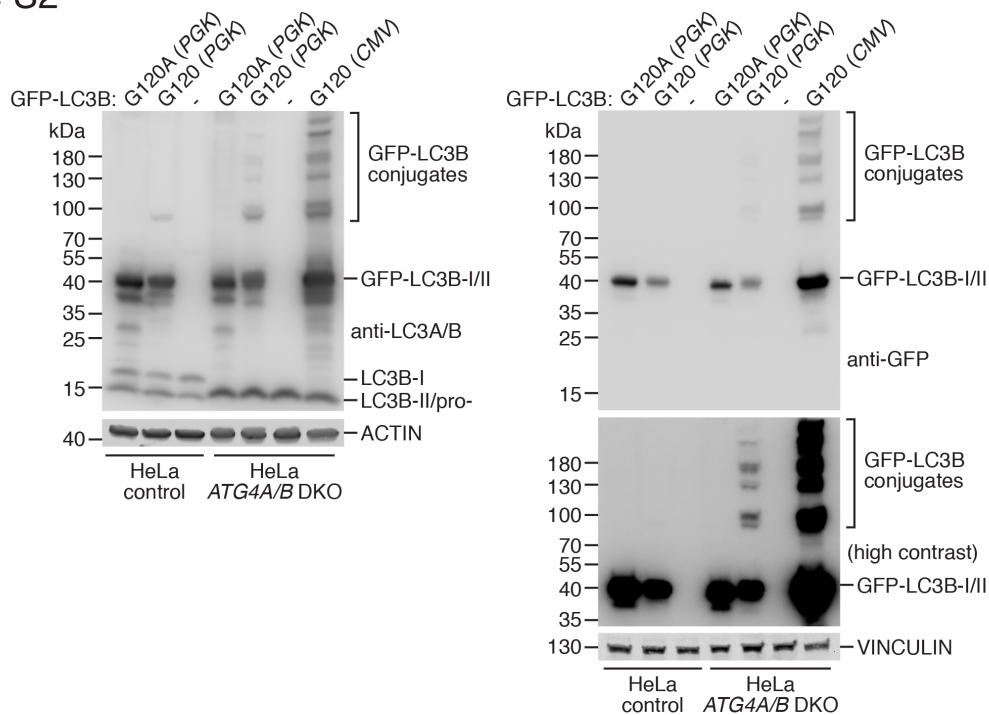

**Figure S2.** GFP-LC3B G120 forms conjugates in ATG4-deficient cells even when expressed at levels comparable to endogenous LC3B. Western blotting of lysates from HeLa control and *ATG4A/B* DKO cells (- = untransduced) stably expressing *PGK* promoter-driven GFP-LC3B G120 or GFP-LC3B G120A. HeLa *ATG4A/B* DKO cells stably expressing *CMV*-driven GFP-LC3B G120 were used as a positive control. GFP-LC3B and conjugates were detected using anti-GFP antibody. Anti-LC3A/B antibody was used to detect both GFP-LC3B and endogenous LC3B in the same samples run on a separate gel. ACTIN and VINCULIN were used as loading controls.

Figure S3

**A**

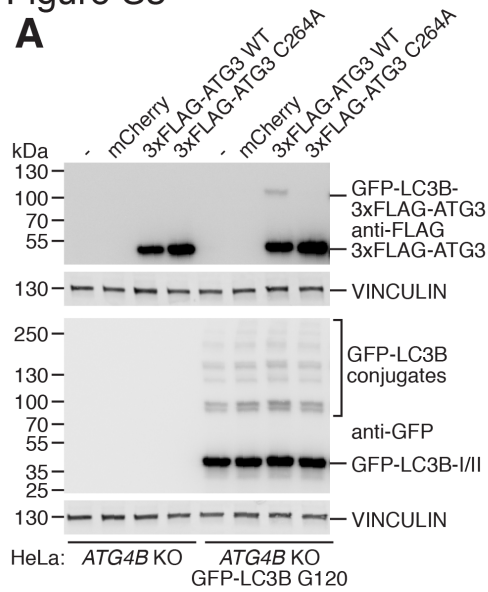

**B**

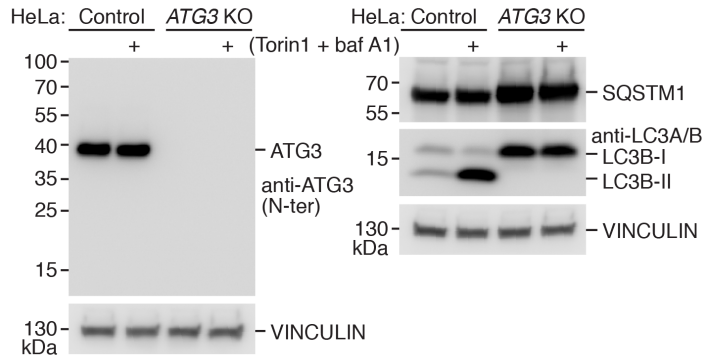

**C**

Human ATG3 protein sequence:  
 M<sup>Q</sup>N<sup>V</sup>I<sup>N</sup>T<sup>V</sup>**V****K**G<sup>K</sup>A<sup>L</sup>E<sup>V</sup>A<sup>E</sup>Y<sup>L</sup>T<sup>P</sup>V<sup>L</sup>**K**E<sup>S</sup>**K**F<sup>K</sup>E<sup>T</sup>G<sup>V</sup>I<sup>T</sup>P<sup>E</sup>F<sup>V</sup>A<sup>A</sup>G<sup>D</sup>H<sup>L</sup>V<sup>H</sup>H<sup>C</sup>P<sup>T</sup>W<sup>Q</sup>A<sup>T</sup>G<sup>E</sup>E<sup>L</sup>**K**V<sup>K</sup>A<sup>Y</sup>L<sup>P</sup>T<sup>G</sup>**K**Q<sup>F</sup>L<sup>V</sup>T<sup>K</sup>N<sup>V</sup>P  
 C<sup>Y</sup>**K**R<sup>C</sup>K<sup>Q</sup>M<sup>E</sup>Y<sup>S</sup>D<sup>E</sup>L<sup>E</sup>A<sup>I</sup>I<sup>E</sup>E<sup>D</sup>D<sup>G</sup>D<sup>G</sup>W<sup>V</sup>D<sup>T</sup>Y<sup>H</sup>N<sup>T</sup>G<sup>I</sup>T<sup>G</sup>I<sup>T</sup>E<sup>A</sup>V<sup>K</sup>E<sup>I</sup>T<sup>L</sup>E<sup>N</sup>**K**D<sup>N</sup>I<sup>R</sup>L<sup>Q</sup>D<sup>C</sup>S<sup>A</sup>L<sup>C</sup>E<sup>E</sup>E<sup>E</sup>D<sup>E</sup>D<sup>E</sup>G<sup>E</sup>A<sup>A</sup>D<sup>M</sup>E<sup>E</sup>Y  
 E<sup>E</sup>S<sup>G</sup>L<sup>L</sup>E<sup>T</sup>D<sup>E</sup>A<sup>T</sup>L<sup>D</sup>T<sup>R</sup>**K**I<sup>V</sup>E<sup>A</sup>C<sup>K</sup>A<sup>K</sup>T<sup>D</sup>A<sup>G</sup>G<sup>E</sup>D<sup>A</sup>I<sup>L</sup>Q<sup>T</sup>R<sup>T</sup>Y<sup>D</sup>L<sup>Y</sup>I<sup>T</sup>Y<sup>D</sup>**K**Y<sup>Q</sup>T<sup>P</sup>R<sup>L</sup>W<sup>L</sup>F<sup>G</sup>Y<sup>D</sup>E<sup>Q</sup>R<sup>O</sup>P<sup>L</sup>T<sup>V</sup>E<sup>H</sup>M<sup>Y</sup>E<sup>D</sup>I<sup>S</sup>Q<sup>D</sup>H  
**V****K****K**T<sup>V</sup>T<sup>I</sup>E<sup>N</sup>H<sup>P</sup>L<sup>P</sup>P<sup>P</sup>M<sup>C</sup>S<sup>V</sup>H<sup>P</sup>C<sup>R</sup>H<sup>A</sup>E<sup>V</sup>M<sup>K</sup>**K**I<sup>I</sup>E<sup>T</sup>V<sup>A</sup>E<sup>G</sup>G<sup>G</sup>E<sup>L</sup>G<sup>V</sup>H<sup>M</sup>Y<sup>L</sup>L<sup>I</sup>F<sup>L</sup>**K**F<sup>V</sup>Q<sup>A</sup>V<sup>I</sup>P<sup>T</sup>I<sup>E</sup>Y<sup>D</sup>Y<sup>T</sup>R<sup>H</sup>F<sup>T</sup>M<sup>\*</sup>

**ATG3 1-13KR:**

|      |      |       |
|------|------|-------|
| K9R  | K62R | K86R  |
| K11R | K64R | K124R |
| K24R | K71R | K131R |
| K27R | K77R |       |
| K29R | K83R |       |

**ATG3 14-22KR:**

|       |       |
|-------|-------|
| K177R | K243R |
| K183R | K271R |
| K185R | K272R |
| K208R | K295R |
| K242R |       |

**ATG3 allKR:**

|      |      |       |       |       |
|------|------|-------|-------|-------|
| K9R  | K62R | K86R  | K177R | K243R |
| K11R | K64R | K124R | K183R | K271R |
| K24R | K71R | K131R | K185R | K272R |
| K27R | K77R |       | K208R | K295R |
| K29R | K83R |       | K242R |       |

**D**

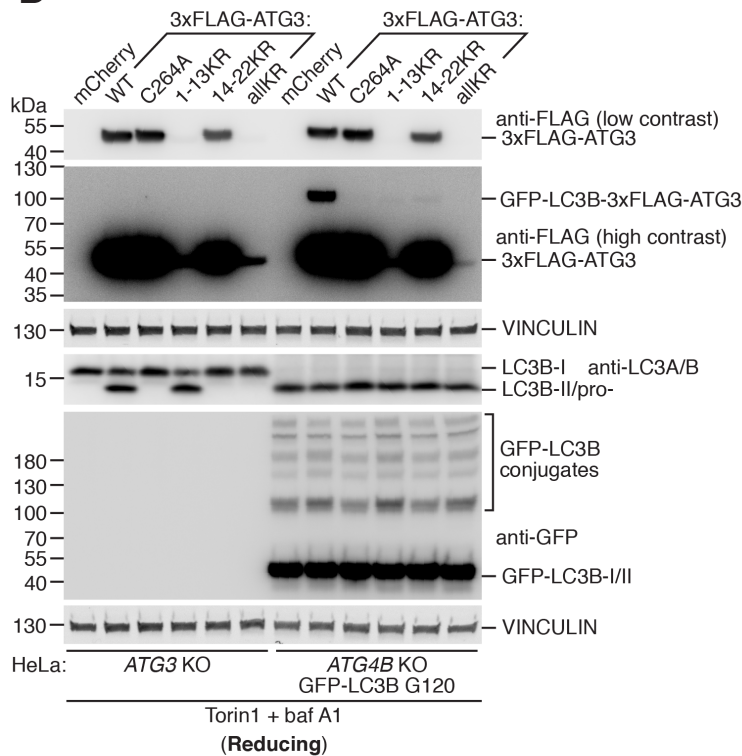

**E**

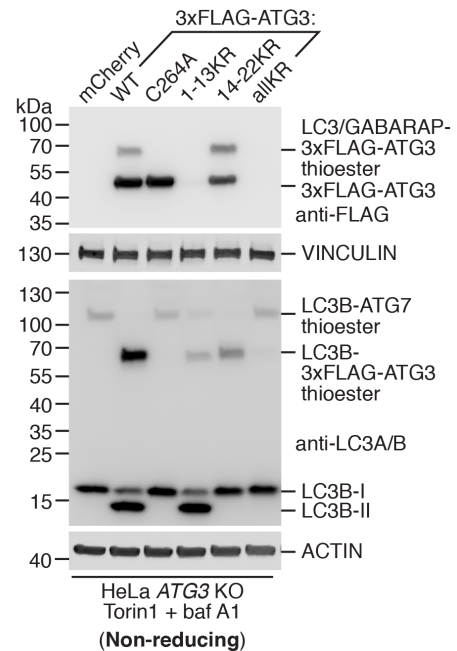

**Figure S3.** Validation and use of cellular reconstitution systems to determine sets of ATG3 lysine residues required for LC3B-ATG3 conjugate formation, LC3B-ATG3 thioester formation and LC3B lipidation.

- (A) Specific reconstitution of the non-thioester conjugate between GFP-LC3B-G120 and transiently expressed 3xFLAG-ATG3 WT. HeLa *ATG4B* KO and *ATG4B* KO cells stably expressing GFP-LC3B G120 were transfected with 3xFLAG-ATG3 constructs, prior to western blot analysis under reducing conditions to disrupt thioester-linked species.
- (B) Western blot validation of HeLa *ATG3* KO cells. HeLa control and *ATG3* KO cells were treated with DMSO or 250 nM Torin1 and 10 nM baf A1 for 3 hours prior to harvesting and western blot analysis to assess endogenous LC3B lipidation, SQSTM1 protein level and ATG3 protein level.
- (C) Key for mutations present in 3xFLAG-ATG3 constructs used in (D) and (E). Wild-type human ATG3 protein sequence is shown, with the 22 lysine (K) residues in bold. The first 13 lysines are shown in green and the last 9 are shown in magenta. The specific residue positions of lysine to arginine mutations are given in the box below each mutation set name.
- (D) Effect of mutating lysine residue sets in 3xFLAG-ATG3 on: rescuing LC3B lipidation in *ATG3* KO cells, and reconstituting GFP-LC3B-3xFLAG-ATG3 conjugate formation in *ATG4B* KO cells stably expressing GFP-LC3B G120. Cells were transfected with indicated constructs and treated for 3 hours with 250 nM Torin1 and 10 nM baf A1 prior to lysis in lysis buffer lacking NEM. Western blotting was performed under reducing conditions to disrupt thioester-linked species.
- (E) Effect of mutating lysine residue sets in 3xFLAG-ATG3 on its ability to form a thioester linkage with endogenous LC3/GABARAP. HeLa *ATG3* KO cells were transfected with indicated constructs and treated for 3 hours with 250 nM Torin1 and 10 nM baf A1 prior to lysis in lysis buffer lacking NEM. Western blotting was performed under non-reducing conditions to preserve thioester-linked species.
